# Supplementary material for: Brain microstructural changes and fatigue after COVID-19
Source: bioRxiv or medRxiv preprint supplement (doi:10.1101/2022.08.20.22279023), 2022-08-22
Supplement: Supplementary file [file media-1.pdf]

## SUPPLEMENTARY MATERIAL

**Supplementary Table 1.** Key cognitive outcome measures

| Cognitive measure name                                                         | Abbreviation | Brief description                                                                                                                                                                                         |
|--------------------------------------------------------------------------------|--------------|-----------------------------------------------------------------------------------------------------------------------------------------------------------------------------------------------------------|
| Spatial working memory, between-errors total                                   | SWMBE        | The number of times a subject incorrectly revisits a box in which a token had already been found.                                                                                                         |
| Spatial working memory, strategy                                               | SWMS         | The number of times a subject starts a new search pattern from the same box they started with earlier.                                                                                                    |
| One-Touch Stockings of Cambridge, Problems solved on the first choice          | OTSPSFC      | The total number of assessed trials where the subject chose the correct answer on their first attempt.                                                                                                    |
| One-Touch Stockings of Cambridge, The average latency for the first choice     | OTSMDLFC     | Average latency, measured from the appearance of the stocking balls to the first box choice, was taken by the subject.                                                                                    |
| One-Touch Stockings of Cambridge, Average of choices to correct                | OTSMCC       | The average number of box selections that the subject took before choosing the correct box.                                                                                                               |
| One-Touch Stockings of Cambridge, Average latency to correct                   | OTSMLC       | Average latency, measured from the appearance of the stocking balls to the choice of the correct box, was taken by the subject.                                                                           |
| Paired Associates Learning, Adjusted total errors                              | PALTEA       | The number of times the subject chose the wrong box for a stimulus in assessment problems plus an adjustment to the estimated number of errors they would have made in any problems, trials, and recalls. |
| Paired Associates Learning, Memory score on the first attempt                  | PALFAMS      | The number of times the subject chooses the correct box on the first attempt to remember its location.                                                                                                    |
| Paired Associates Learning, Mean errors to success                             | PALMETS      | The average number of attempts to complete a test stage                                                                                                                                                   |
| Pattern Recognition Memory, the percentage of correct answers, immediate       | PRMPCI       | Number of patterns correctly selected by the subject in the immediate "forced-choice" condition, expressed as a percentage                                                                                |
| Pattern Recognition Memory, the percentage of correct answers, delayed         | PRMPCD       | The number of patterns correctly selected by the subject in the delayed "forced-choice" condition expressed as a percentage.                                                                              |
| Verbal Recognition Memory, Immediate verbal recognition, total correct answers | VRMIRTC      | Total target words correctly recognized in the immediate recognition phase, plus the total number of distracting words that the subject correctly rejects.                                                |
| Verbal Recognition Memory, Delayed verbal recognition, total correct answers   | VRMDRTC      | The total number of target words correctly recognized in the delayed recognition phase, plus the total number of distracting words that the subject correctly rejects.                                    |
| Verbal Recognition Memory, Free verbal recall, different stimuli               | VRMFRDS      | Total number of different stimuli that are correctly remembered by the subject in the phase of free word list recall                                                                                      |
| Single-choice median reaction time                                             | RTISMDRT     | Median time taken to release the button after presenting a target stimulus. Measured in milliseconds                                                                                                      |
| Single-choice median movement time                                             | RTISMDMT     | Median time taken to release the button and select the target stimulus after it flashes yellow on the screen. It is measured in milliseconds.                                                             |
| Five-choice median reaction time                                               | RTIFMDRT     | Median time taken to release the button after the target stimulus flashes yellow on the screen. Measured in milliseconds                                                                                  |
| Five-choice median movement time                                               | RTIFMDMT     | Median time taken to release the button and select the target stimulus after it flashes yellow on the screen. It is measured in milliseconds.                                                             |

**Supplementary Table 2.** TBSS results significantly reduced AFD<sub>total</sub> in the COV+ group compared to the COV- group. The anatomical locations were determined by referring to the JHU white-matter tractography atlas. The value after each region indicates the percentage probability of the cluster belonging to the given atlas label.

| Cluster                  | White matter tract                                        | p-value | Voxels | MNI (x y z) (mm) |     |    |
|--------------------------|-----------------------------------------------------------|---------|--------|------------------|-----|----|
| corrected p-value < 0.05 |                                                           |         |        |                  |     |    |
| AFDtotal / COV- > COV+   |                                                           |         |        |                  |     |    |
| 1                        | Anterior thalamic radiation L:0.3928                      | 0.026   | 4,515  | -35              | -19 | 34 |
|                          | Corticospinal tract L:4.5856                              |         |        |                  |     |    |
|                          | Cingulum (cingulate gyrus) L:0.0829                       |         |        |                  |     |    |
|                          | Inferior fronto-occipital fasciculus L:0.0108             |         |        |                  |     |    |
|                          | Inferior longitudinal fasciculus L:0.0775                 |         |        |                  |     |    |
|                          | Superior longitudinal fasciculus L:12.4739                |         |        |                  |     |    |
|                          | Superior longitudinal fasciculus (temporal part) L:4.3892 |         |        |                  |     |    |

Abbreviations: TBSS, tract-based spatial statistics; MNI, Montreal Neurological Institute; L, an abbreviation for the left hemisphere, R, abbreviation for the right hemisphere; AFD<sub>total</sub>, voxel-wise apparent fiber density.

**Supplementary Table 3.** TBSS results show a negative correlation between ADt and CFQ-11 in the COV+ group. The anatomical locations were determined by referring to the JHU white-matter tractography atlas. The value after each region indicates the percentage probability of the cluster belonging to the given atlas label.

| Cluster                                     | White matter tract                                                                                                                                                                                                                                                                                                                                                                                                                                                                                                                                                                                                                                                                                                                                                                                  | p-value | Voxels | MNI (x y z) (mm) |     |     |
|---------------------------------------------|-----------------------------------------------------------------------------------------------------------------------------------------------------------------------------------------------------------------------------------------------------------------------------------------------------------------------------------------------------------------------------------------------------------------------------------------------------------------------------------------------------------------------------------------------------------------------------------------------------------------------------------------------------------------------------------------------------------------------------------------------------------------------------------------------------|---------|--------|------------------|-----|-----|
| corrected p-value < 0.05                    |                                                                                                                                                                                                                                                                                                                                                                                                                                                                                                                                                                                                                                                                                                                                                                                                     |         |        |                  |     |     |
| Negative correlation between ADt and CFQ-11 |                                                                                                                                                                                                                                                                                                                                                                                                                                                                                                                                                                                                                                                                                                                                                                                                     |         |        |                  |     |     |
| 1                                           | Anterior thalamic radiation L:7.3333<br>Cingulum (cingulate gyrus) L:1.8889<br>Forceps minor:47.8889<br>Inferior fronto-occipital fasciculus L:1.6667<br>Uncinate fasciculus L:0.3333                                                                                                                                                                                                                                                                                                                                                                                                                                                                                                                                                                                                               | 0.044   | 53     | -19              | 48  | 10  |
| 2                                           | Anterior thalamic radiation L:6.2500<br>Cingulum (cingulate gyrus) L:2.6250<br>Forceps minor:32.8750<br>Inferior fronto-occipital fasciculus L:1.1250                                                                                                                                                                                                                                                                                                                                                                                                                                                                                                                                                                                                                                               | 0.041   | 60     | -17              | 45  | 20  |
| 3                                           | Cingulum (cingulate gyrus) L:6.9444<br>Forceps minor:32.7778                                                                                                                                                                                                                                                                                                                                                                                                                                                                                                                                                                                                                                                                                                                                        | 0.036   | 144    | -12              | 23  | 19  |
| 4                                           | Anterior thalamic radiation R:10.4706<br>Cingulum (cingulate gyrus) R:0.0294<br>Forceps minor:42.7647<br>Inferior fronto-occipital fasciculus R:1.4118<br>Uncinate fasciculus R:0.0882                                                                                                                                                                                                                                                                                                                                                                                                                                                                                                                                                                                                              | 0.034   | 328    | 18               | 52  | 15  |
| 5                                           | Anterior thalamic radiation L:1.6008<br>Anterior thalamic radiation R:1.3787<br>Corticospinal tract L:2.3020<br>Corticospinal tract R:2.2288<br>Cingulum (cingulate gyrus) L:0.2892<br>Cingulum (cingulate gyrus) R:0.0662<br>Cingulum (hippocampus) L:0.0006<br>Forceps major:0.2496<br>Forceps minor:0.0256<br>Inferior fronto-occipital fasciculus L:1.2630<br>Inferior fronto-occipital fasciculus R:1.2924<br>Inferior longitudinal fasciculus L:0.3944<br>Inferior longitudinal fasciculus R:0.1521<br>Superior longitudinal fasciculus L:2.1668<br>Superior longitudinal fasciculus R:1.7983<br>Uncinate fasciculus L:0.4263<br>Uncinate fasciculus R:0.2793<br>Superior longitudinal fasciculus (temporal part)<br>L:0.8453<br>Superior longitudinal fasciculus (temporal part)<br>R:0.5638 | <0.001  | 24,840 | 14               | -18 | -14 |

Abbreviations: TBSS, tract-based spatial statistics; MNI, Montreal Neurological Institute; L, an abbreviation for the left hemisphere, R, abbreviation for the right hemisphere; ADt, tissue axial diffusivity.

**Supplementary Table 4.** TBSS results show a negative correlation between FAt and CFQ-11 in the COV+ group. The anatomical locations were determined by referring to the JHU white-matter tractography atlas. The value after each region indicates the percentage probability of the cluster belonging to the given atlas label.

| Cluster                                     | White matter tract                                                                                                                          | p-value | Voxels | MNI (x y z) (mm) |     |    |
|---------------------------------------------|---------------------------------------------------------------------------------------------------------------------------------------------|---------|--------|------------------|-----|----|
| corrected p-value < 0.05                    |                                                                                                                                             |         |        |                  |     |    |
| Negative correlation between FAt and CFQ-11 |                                                                                                                                             |         |        |                  |     |    |
| 1                                           | Corticospinal tract R:27.0000                                                                                                               | 0.049   | 13     | 21               | -33 | 51 |
| 2                                           | Corticospinal tract R:10.0806<br>Superior longitudinal fasciculus R:16.4677<br>Superior longitudinal fasciculus (temporal part)<br>R:5.1290 | 0.036   | 522    | 27               | -16 | 30 |

Abbreviations: TBSS, tract-based spatial statistics; MNI, Montreal Neurological Institute; R, abbreviation for the right hemisphere; FAt, tissue fractional anisotropy.

**Supplementary Table 5.** Comparison of tract-average FW, FAt, and FD measures between control and COVID-19 groups, adjusting for multiple comparisons (FDR). Age and sex were included as covariates.

| Tract              | N  | FW        |         |       | FAt       |         |       | FD        |         |        |
|--------------------|----|-----------|---------|-------|-----------|---------|-------|-----------|---------|--------|
|                    |    | statistic | p-value | adj p | statistic | p-value | adj p | statistic | p-value | adj p  |
| Association Tracts |    |           |         |       |           |         |       |           |         |        |
| AF (L)             | 83 | 1.3404    | 0.1840  | ns    | -1.4041   | 0.1642  | ns    | -2.7668   | 0.0070  | 0.0176 |
| AF (R)             | 83 | 0.0777    | 0.9382  | ns    | -1.4549   | 0.1497  | ns    | -1.1706   | 0.2453  | ns     |
| CG (L)             | 83 | 0.4322    | 0.6668  | ns    | -1.1128   | 0.2692  | ns    | -2.0862   | 0.0402  | ns     |
| CG (R)             | 83 | 0.6208    | 0.5365  | ns    | -0.4699   | 0.6397  | ns    | -1.2945   | 0.1993  | ns     |
| FX (L)             | 83 | -1.2586   | 0.2119  | ns    | 0.2182    | 0.8279  | ns    | 0.0838    | 0.9334  | ns     |
| FX (R)             | 83 | -1.0000   | 0.2883  | ns    | -0.3594   | 0.7203  | ns    | -0.8627   | 0.3909  | ns     |
| IFOF (L)           | 83 | 0.2981    | 0.7664  | ns    | -0.5843   | 0.5607  | ns    | -1.1916   | 0.2370  | ns     |
| IFOF (R)           | 83 | -1.0898   | 0.2791  | ns    | -0.5276   | 0.5992  | ns    | -0.8180   | 0.4158  | ns     |
| ILF (L)            | 83 | 0.4894    | 0.6259  | ns    | -0.3538   | 0.7245  | ns    | -0.8028   | 0.4245  | ns     |
| ILF (R)            | 83 | -1.2750   | 0.2060  | ns    | -0.3735   | 0.7098  | ns    | 0.7067    | 0.4818  | ns     |
| SLF1 (L)           | 82 | 0.7935    | 0.4299  | ns    | -0.2917   | 0.7713  | ns    | -1.1157   | 0.2680  | ns     |
| SLF1 (R)           | 82 | 0.1050    | 0.9167  | ns    | -0.0680   | 0.9460  | ns    | -1.0808   | 0.2831  | ns     |
| SLF2 (L)           | 83 | 0.7492    | 0.4560  | ns    | -1.9440   | 0.0555  | ns    | -4.1441   | 0.0001  | 0.0003 |
| SLF2 (R)           | 83 | 0.3672    | 0.7145  | ns    | -0.5532   | 0.5817  | ns    | -0.9890   | 0.3257  | ns     |
| SLF3 (L)           | 83 | 1.3674    | 0.1754  | ns    | -1.2180   | 0.2268  | ns    | -2.4932   | 0.0147  | 0.0338 |
| SLF3 (R)           | 83 | 0.0050    | 0.9960  | ns    | -0.6692   | 0.5053  | ns    | -1.1172   | 0.2673  | ns     |
| UF (L)             | 83 | 1.1968    | 0.2350  | ns    | -0.8132   | 0.4185  | ns    | -0.9967   | 0.3219  | ns     |
| UF (R)             | 83 | 0.8023    | 0.4248  | ns    | -0.6405   | 0.5237  | ns    | -2.0819   | 0.0406  | ns     |
| Projection Tracts  |    |           |         |       |           |         |       |           |         |        |
| CR (L)             | 83 | 1.0810    | 0.2830  | ns    | -1.7953   | 0.0764  | ns    | -1.7566   | 0.0829  | ns     |
| CR (R)             | 83 | 0.6288    | 0.5313  | ns    | -0.9705   | 0.3348  | ns    | -0.9170   | 0.3619  | ns     |
| CST (L)            | 83 | 0.6414    | 0.5231  | ns    | -1.7264   | 0.0882  | ns    | -1.7133   | 0.0906  | ns     |
| CST (R)            | 83 | 1.1909    | 0.2373  | ns    | -0.6567   | 0.5133  | ns    | -0.7963   | 0.4282  | ns     |
| OR (L)             | 83 | 0.4395    | 0.6615  | ns    | -1.1504   | 0.2534  | ns    | -1.5422   | 0.1270  | ns     |
| OR (R)             | 83 | -1.4913   | 0.1399  | ns    | -1.1942   | 0.2360  | ns    | -0.2631   | 0.7932  | ns     |
| Corpus Callosum    |    |           |         |       |           |         |       |           |         |        |
| Rostrum            | 83 | -0.0750   | 0.9404  | ns    | -0.7661   | 0.4459  | ns    | -1.2245   | 0.2244  | ns     |
| Genu (A)           | 83 | 0.0628    | 0.9501  | ns    | -0.4008   | 0.6896  | ns    | -0.6928   | 0.4905  | ns     |
| Genu (P)           | 83 | 0.2716    | 0.7867  | ns    | -0.3049   | 0.7613  | ns    | -0.5060   | 0.6143  | ns     |
| Rostral Body       | 83 | 0.4940    | 0.6226  | ns    | -0.3849   | 0.7014  | ns    | -1.0515   | 0.2962  | ns     |
| Mid-Body (A)       | 83 | 0.8628    | 0.3909  | ns    | -0.8193   | 0.4151  | ns    | -1.3758   | 0.1728  | ns     |
| Mid-Body (P)       | 83 | 1.7139    | 0.0905  | ns    | -1.1160   | 0.2678  | ns    | -1.8233   | 0.0720  | ns     |
| Isthmus            | 83 | 0.6921    | 0.4909  | ns    | -0.1809   | 0.8569  | ns    | -0.9417   | 0.3492  | ns     |
| Splenium           | 83 | 0.8067    | 0.4223  | ns    | -2.0815   | 0.0406  | ns    | -1.8938   | 0.0619  | ns     |
| Cerebellar Tracts  |    |           |         |       |           |         |       |           |         |        |
| MCP                | 83 | -0.5661   | 0.5729  | ns    | -1.6840   | 0.0961  | ns    | 0.7375    | 0.4630  | ns     |
| SCP (L)            | 83 | -0.3679   | 0.7139  | ns    | -0.7190   | 0.4742  | ns    | 0.0006    | 0.9995  | ns     |
| SCP (R)            | 83 | 0.1060    | 0.9158  | ns    | 0.2269    | 0.8211  | ns    | 0.6936    | 0.4900  | ns     |

Abbreviations: AF, arcuate fasciculus; CG, cingulum; IFOF, inferior frontal occipital fasciculus; ILF, inferior longitudinal fasciculus; SLF, superior longitudinal fasciculus; UF, uncinate fasciculus; CR, corona radiata; CST, corticospinal tract; OR, optic radiation; SCP, superior cerebellar peduncle; MCP, middle cerebellar peduncle; A, anterior; P, posterior; L, left; R, right; FDR, false discovery rate; FW, free-water; FAt, tissue fractional anisotropy; FD, fiber-specific apparent fiber density; ns, not significant; adj, adjusted. Significant p values at a threshold of  $p < 0.05$  are indicated in bold font.

**Supplementary Table 6.** Comparison of tract-average MDt, RDt, and ADt measures between control and COVID-19 groups, adjusting for multiple comparisons (FDR). Age and sex were included as covariates.

| Tract              | N  | MDt       |         |       | RDt       |         |        | ADt       |         |        |
|--------------------|----|-----------|---------|-------|-----------|---------|--------|-----------|---------|--------|
|                    |    | statistic | p-value | adj p | statistic | p-value | adj p  | statistic | p-value | adj p  |
| Association Tracts |    |           |         |       |           |         |        |           |         |        |
| AF (L)             | 83 | 2.1929    | 0.0313  | ns    | 2.0792    | 0.0408  | ns     | 1.5321    | 0.1295  | ns     |
| AF (R)             | 83 | -0.8679   | 0.3881  | ns    | 0.2660    | 0.7909  | ns     | -2.6631   | 0.0094  | 0.0285 |
| CG (L)             | 83 | 1.3288    | 0.1878  | ns    | 1.4035    | 0.1644  | ns     | 0.2878    | 0.7742  | ns     |
| CG (R)             | 83 | 0.0564    | 0.9552  | ns    | 0.2337    | 0.8158  | ns     | -0.2846   | 0.7767  | ns     |
| FX (L)             | 83 | -1.8241   | 0.0719  | ns    | -1.6269   | 0.1077  | ns     | -1.8417   | 0.0693  | ns     |
| FX (R)             | 83 | -0.7085   | 0.4807  | ns    | -0.7633   | 0.4475  | ns     | -0.6263   | 0.5329  | ns     |
| IFOF (L)           | 83 | 0.6257    | 0.5333  | ns    | 0.7522    | 0.4541  | ns     | -0.1598   | 0.8734  | ns     |
| IFOF (R)           | 83 | -1.1838   | 0.2401  | ns    | -0.2003   | 0.8418  | ns     | -1.9240   | 0.0580  | ns     |
| ILF (L)            | 83 | 0.6882    | 0.4934  | ns    | 0.4707    | 0.6391  | ns     | 0.5611    | 0.5763  | ns     |
| ILF (R)            | 83 | -1.1994   | 0.2340  | ns    | -0.5102   | 0.6113  | ns     | -1.4912   | 0.1399  | ns     |
| SLF1 (L)           | 82 | 1.6094    | 0.1116  | ns    | 1.0080    | 0.3166  | ns     | 1.8319    | 0.0708  | ns     |
| SLF1 (R)           | 82 | -0.1877   | 0.8516  | ns    | -0.2141   | 0.8310  | ns     | -0.0399   | 0.9683  | ns     |
| SLF2 (L)           | 83 | 2.0859    | 0.0402  | ns    | 2.3632    | 0.0206  | 0.0430 | 0.8378    | 0.4047  | ns     |
| SLF2 (R)           | 83 | -0.6642   | 0.5085  | ns    | -0.0191   | 0.9848  | ns     | -1.4407   | 0.1536  | ns     |
| SLF3 (L)           | 83 | 2.1166    | 0.0374  | ns    | 1.9132    | 0.0593  | ns     | 1.6985    | 0.0933  | ns     |
| SLF3 (R)           | 83 | -0.8427   | 0.4019  | ns    | -0.0810   | 0.9357  | ns     | -1.9718   | 0.0521  | ns     |
| UF (L)             | 83 | 1.1821    | 0.2407  | ns    | 1.1402    | 0.2577  | ns     | 0.4096    | 0.6832  | ns     |
| UF (R)             | 83 | 0.0332    | 0.9736  | ns    | 0.5227    | 0.6027  | ns     | -0.8499   | 0.3979  | ns     |
| Projection Tracts  |    |           |         |       |           |         |        |           |         |        |
| L CR               | 83 | 1.4985    | 0.1380  | ns    | 1.9211    | 0.0583  | ns     | 0.0287    | 0.9772  | ns     |
| R CR               | 83 | -0.5312   | 0.5968  | ns    | 0.3399    | 0.7348  | ns     | -1.3631   | 0.1767  | ns     |
| L CST              | 83 | 1.0825    | 0.2823  | ns    | 1.6493    | 0.1031  | ns     | -0.1215   | 0.9036  | ns     |
| R CST              | 83 | -0.3254   | 0.7458  | ns    | 0.2484    | 0.8045  | ns     | -0.8342   | 0.4067  | ns     |
| L OR               | 83 | 1.0443    | 0.2996  | ns    | 1.1044    | 0.2728  | ns     | 0.3050    | 0.7612  | ns     |
| R OR               | 83 | -0.8172   | 0.4163  | ns    | 0.1995    | 0.8424  | ns     | -1.9637   | 0.0531  | ns     |
| Corpus Callosum    |    |           |         |       |           |         |        |           |         |        |
| Rostrum            | 83 | -0.0924   | 0.9266  | ns    | 0.5232    | 0.6023  | ns     | -0.9860   | 0.3271  | ns     |
| Genu (A)           | 83 | -0.0339   | 0.9730  | ns    | 0.4381    | 0.6625  | ns     | -0.6113   | 0.5428  | ns     |
| Genu (P)           | 83 | 0.4856    | 0.6286  | ns    | 0.6013    | 0.5494  | ns     | -0.0025   | 0.9980  | ns     |
| Rostral Body       | 83 | 0.4179    | 0.6771  | ns    | 0.5382    | 0.5920  | ns     | -0.0482   | 0.9617  | ns     |
| Mid-body (A)       | 83 | 0.4803    | 0.6323  | ns    | 0.7926    | 0.4304  | ns     | -0.2377   | 0.8128  | ns     |
| Mid-body (P)       | 83 | 1.4107    | 0.1623  | ns    | 1.4722    | 0.1449  | ns     | 0.5678    | 0.5717  | ns     |
| Isthmus            | 83 | 1.2853    | 0.2024  | ns    | 0.6038    | 0.5477  | ns     | 1.3354    | 0.1856  | ns     |
| Splenium           | 83 | 1.0173    | 0.3121  | ns    | 1.8827    | 0.0634  | ns     | -0.6168   | 0.5391  | ns     |
| Cerebellar Tracts  |    |           |         |       |           |         |        |           |         |        |
| MCP                | 83 | 0.1954    | 0.8456  | ns    | 1.1784    | 0.2422  | ns     | -1.0125   | 0.3144  | ns     |
| L SCP              | 83 | -0.1880   | 0.8514  | ns    | 0.7507    | 0.4551  | ns     | -0.6707   | 0.5043  | ns     |
| R SCP              | 83 | -0.1208   | 0.9041  | ns    | -0.0771   | 0.9387  | ns     | -0.0611   | 0.9514  | ns     |

Abbreviations: AF, arcuate fasciculus; CG, cingulum; IFOF, inferior frontal occipital fasciculus; ILF, inferior longitudinal fasciculus; SLF, superior longitudinal fasciculus; UF, uncinate fasciculus; CR, corona radiata; CST, corticospinal tract; OR, optic radiation; SCP, superior cerebellar peduncle; MCP, middle cerebellar peduncle; A, anterior; P, posterior; L, left; R, right; FDR, false discovery rate; MDt, tissue mean diffusivity; RDt, tissue radial diffusivity; ADt, tissue axial diffusivity; ns, not significant; adj, adjusted.

**Supplementary Table 7.** Tract profiles showing significant between-group differences. The t- and p-values, and the corrected significance threshold computed from permutations (threshold) are shown. The difference is significant when the p-value is lower than 0.05, and the t-value in absolute value is greater than the significance threshold. It is a significant increase in control group versus COVID-19 when the t-value is positive, and a significant decrease when it is negative.

**[The table is in a separate file]**

**Supplementary Figure 1.** Results of the between-group comparisons on tractometry analysis (association tracts): control (red line) and COVID-19 (green line) groups. Only results with a  $p < 0.05$  and a t-value greater than the significance threshold are reported. The dashed red line indicates whether the FD values of the COVID-19 group were significantly lower than those of the control group.

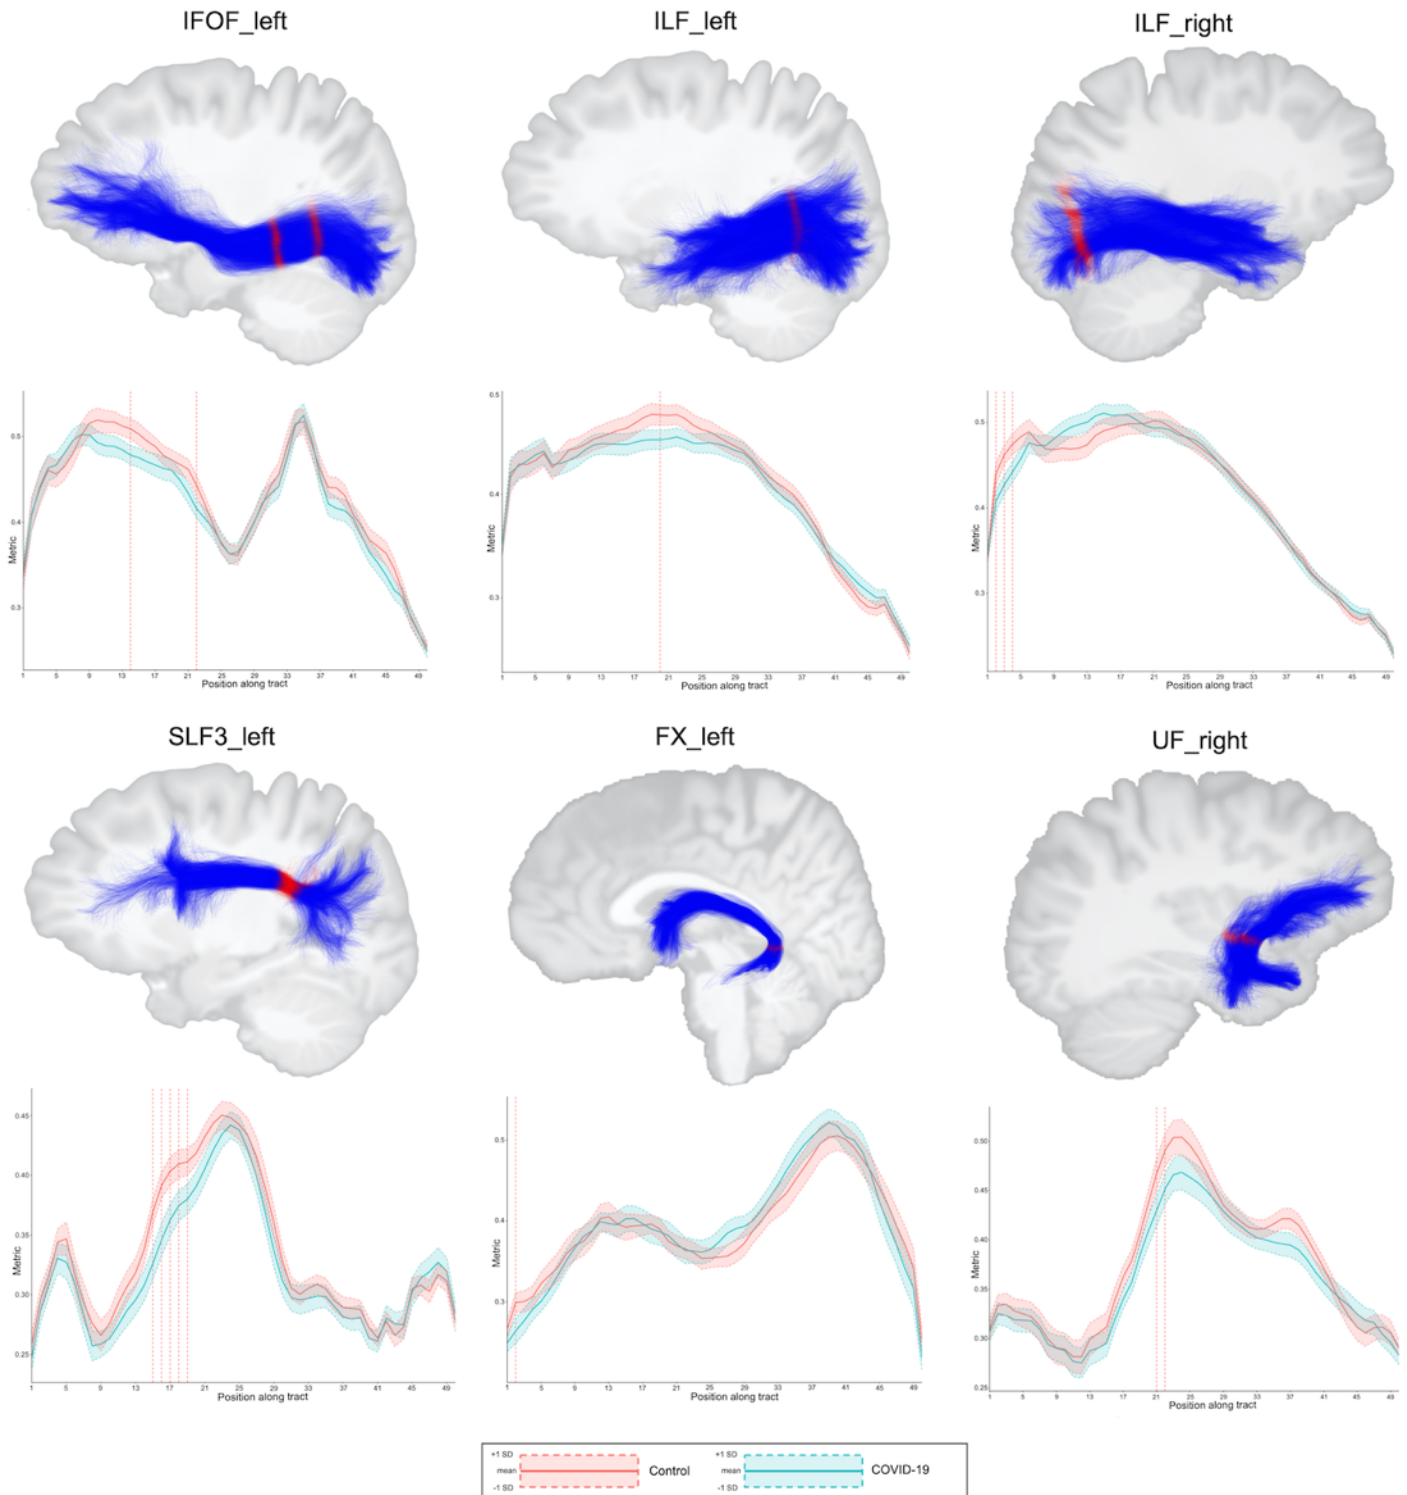

Abbreviations: FX, fornix; IFOF, inferior frontal occipital fasciculus; ILF, inferior longitudinal fasciculus; SLF, superior longitudinal fasciculus; FD, fiber-specific apparent fiber density.

The figures illustrate the tracts in blue and the regions with significance in red.



**Supplementary Figure 2.** Associations between diffusion measures and total CFQ-11 score in the COV+ group. (A–C) Associations between FD and total CFQ-11 in the posterior mid-body of the corpus callosum and middle cerebellar peduncle. (B–D) Partial correlations between diffusion measures (average diffusion measure in the bundle) and total CFQ-11 score controlling for age, sex, and education were performed. The partial correlation coefficient for each diffusion measure in the bundles is reported as bar graphs (\* $p < 0.05$ ), with adjustment for multiple comparisons (FDR).

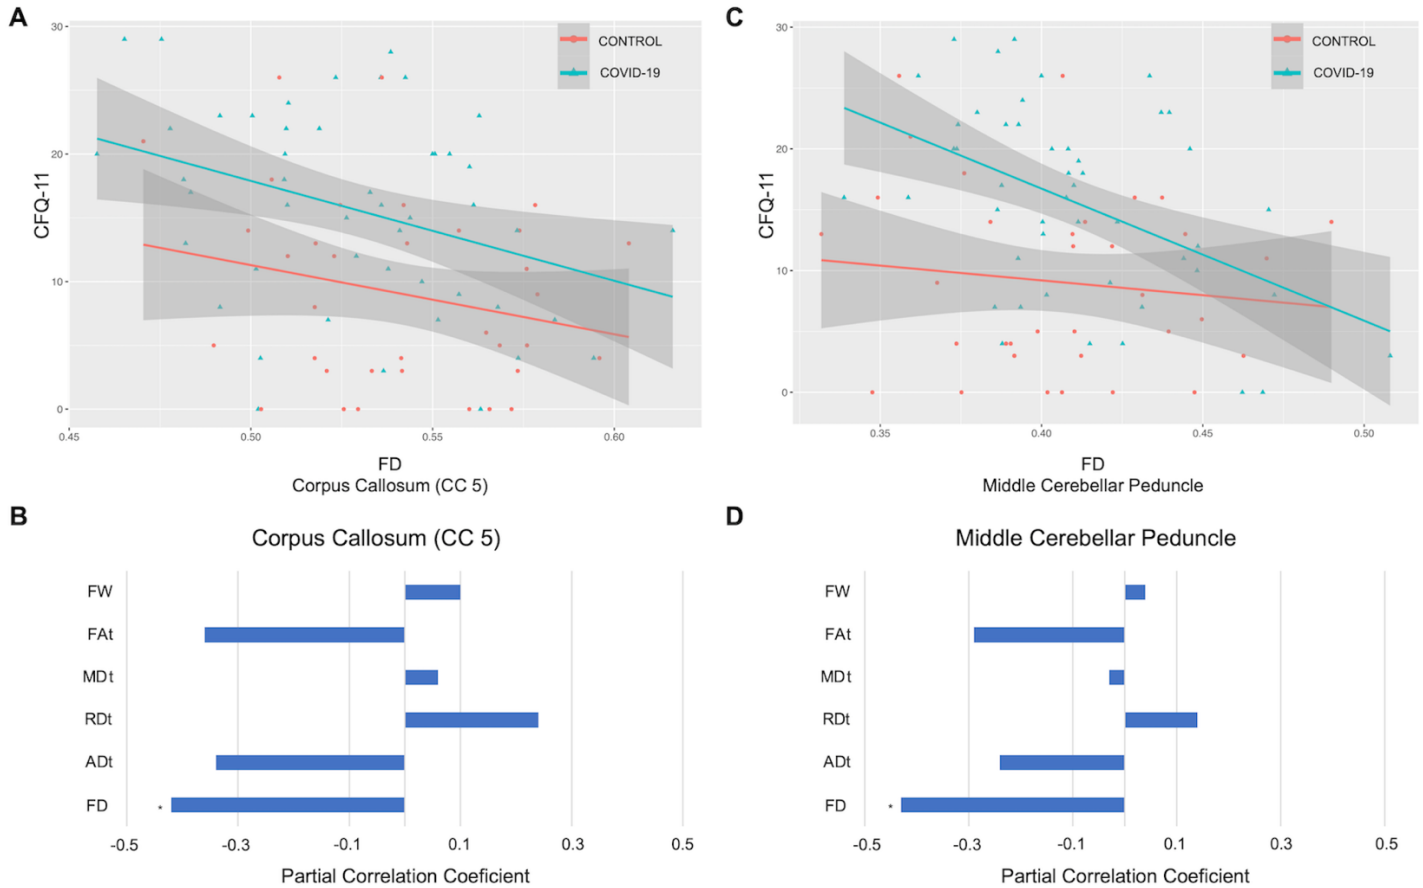

Abbreviations: CFQ-11, Chalder Fatigue Scale; ADt, tissue axial diffusivity; FD, fiber-specific apparent fiber density; FAt, tissue fractional anisotropy; MDt, tissue mean diffusivity; RDt, tissue radial diffusivity; FW, free-water index; CC 5, posterior mid-body of the corpus callosum; FDR = false discovery rate.

Legend: \*  $p < 0.05$
